# Supplementary material for: Morphological and Taxonomic Properties of Tokyovirus, the First Marseilleviridae Member Isolated from Japan
Source: PubMed Central journal article supplement (PMC5158117; doi:10.1264/jsme2.me16107), 2016-11-19
Supplement: 31_442_s1.pdf [file 31_442_s1.pdf]

**Table S1** Accession numbers of the 32 B-family DNA polymerase sequences used for this study in Figs. 5A and S6

| Accession No. | Sequence name                                         |
|---------------|-------------------------------------------------------|
| AFM52356      | <i>Megavirus terra1</i>                               |
| AFM52364      | <i>Megavirus courdo5</i>                              |
| AEX61758      | <i>Megavirus courdo7</i>                              |
| AEX62677      | <i>Moumouvirus monve</i>                              |
| YP_003986825  | <i>Acanthamoeba polyphaga mimivirus (APMV)</i>        |
| AEQ60511      | <i>Acanthamoeba castellanii mamavirus</i>             |
| AHA45542      | <i>Hirudovirus strain Sangsue</i>                     |
| ALR83902      | <i>Niemeyer virus</i>                                 |
| YP_003970130  | <i>Cafeteria roenbergensis virus BV-PW1</i>           |
| NP_048107     | <i>Choristoneura biennis entomopoxvirus</i>           |
| NP_039057     | <i>Fowlpox virus</i>                                  |
| YP_004821396  | <i>Yoka poxvirus</i>                                  |
| NP_042094     | <i>Variola virus</i>                                  |
| AAB59829      | <i>Vaccinia virus</i>                                 |
| ADX22900      | <i>Monkeypox virus</i>                                |
| YP_008052566  | <i>Phaeocystis globosa virus</i>                      |
| AHC54969      | <i>Tunisvirus fontaine 2</i>                          |
| AHA45970      | <i>Insectomime virus</i>                              |
| YP_009238893  | <i>Brazilian marseillevirus</i>                       |
| YP_004347308  | <i>Lausannevirus</i>                                  |
| ALH07009      | <i>Port-Miou virus</i>                                |
| YP_009255117  | <i>Tokyovirus (Tokyovirus A1)</i>                     |
| YP_009094792  | <i>Melbournevirus</i>                                 |
| AGV01694      | <i>Cannes 8 virus</i>                                 |
| YP_009000951  | <i>Pithovirus sibericum</i>                           |
| YP_002154715  | <i>Feldmannia species virus</i>                       |
| AGE58955      | <i>Paramecium bursaria Chlorella virus OR0704.2.2</i> |
| AGE57130      | <i>Acanthocystis turfacea Chlorella virus NE-JV-3</i> |
| ALD62120      | <i>Mollivirus sibericum</i>                           |
| YP_008436920  | <i>Pandoravirus salinus</i>                           |
| AGO82327      | <i>Pandoravirus dulcis</i>                            |
| YP_009120445  | <i>Pandoravirus innopinatum</i>                       |

**Table S2** Accession numbers of the 10 PCNA sequences used for this study in Fig. 5B

| Accession No. | Sequence name                   |
|---------------|---------------------------------|
| AHA46099      | <i>Insectomime virus</i>        |
| AHC54833      | <i>Tunisvirus fontaine 2</i>    |
| YP_009238758  | <i>Brazilian marseillevirus</i> |
| YP_004347173  | <i>Lausannevirus</i>            |
| ALH06885      | <i>Port-Miou virus</i>          |
| YP_009254994  | <i>Tokyovirus A1</i>            |
| AGV01569      | <i>Cannes 8 virus</i>           |
| YP_003406953  | <i>Marseillevirus</i>           |
| AIT54803      | <i>Melbournevirus</i>           |
| AAQ09580      | APMV                            |

**Table S3** Accession numbers of the 10 DNA-directed RNA polymerase sequences used for this study in Fig. 5C

| Accession No. | Sequence name                   |
|---------------|---------------------------------|
| AHA46303      | <i>Insectomime virus</i>        |
| AHC55114      | <i>Tunisvirus fontaine 2</i>    |
| YP_009238536  | <i>Brazilian marseillevirus</i> |
| AEA06871      | <i>Lausannevirus</i>            |
| ALH06713      | <i>Port-Miou virus</i>          |
| YP_009255194  | <i>Tokyovirus A1</i>            |
| YP_003406803  | <i>Marseillevirus</i>           |
| AGV01404      | <i>Cannes 8 virus</i>           |
| YP_009094549  | <i>Melbournevirus</i>           |
| AAQ09585      | APMV                            |

**Table S4** Number of amoeba cells including virion factories (VF) of various types (PI 0–10 h p.i.) for Fig. S3

| p.i.<br>(h) | No VF | 1 VF | 2 or more VFs | Large VF | Total |
|-------------|-------|------|---------------|----------|-------|
| 0           | 300   | 0    | 0             | 0        | 300   |
| 2           | 281   | 14   | 5             | 0        | 300   |
| 4           | 178   | 98   | 24            | 0        | 300   |
| 6           | 176   | 112  | 11            | 1        | 300   |
| 8           | 82    | 176  | 25            | 17       | 300   |
| 10          | 20    | 172  | 37            | 71       | 300   |

**Table S5** Number of amoeba cells including virion factories (VF) of various types (12–24 h p.i.) for Fig. S3

| p.i.<br>(h) | No VF | 1 VF | 2 or more VFs | Large VF | Total |
|-------------|-------|------|---------------|----------|-------|
| 0           | 400   | 0    | 0             | 0        | 400   |
| 12          | 32    | 130  | 13            | 225      | 400   |
| 18          | 35    | 88   | 30            | 247      | 400   |
| 24          | 30    | 26   | 16            | 328      | 400   |

## Supplementary figure legends

Fig. S1. Various putative entry mechanisms of *Tokyovirus* into *Acanthamoeba* cells. *Tokyovirus* shows several morphological features in infected *Acanthamoeba* cells (5). Dotted circles indicate giant vesicles including several (or many) viral particles surrounding by membranes. Arrows indicate single particles in *Acanthamoeba* cells without membranes. Dotted arrows indicate single particles surrounded by membranes. Scale bar, 500 nm.

Fig. S2. *Tokyovirus* particles in the virion factory. Arrows indicate viral particles proceeding simultaneous assembly of DNA and capsid. Scale bar, 500 nm.

Fig. S3. Time course analysis of virion factories. *Tokyovirus* was used in PYG medium. The MOI was not determined, but was sufficient to cause a cytopathic effect (CPE) in all amoeba cells. Amoeba cells cultured in a 12-well microplate infected by *Tokyovirus* were harvested 2, 4, 6, 8, 10, and 12 h p.i., and were centrifuged at  $150 \times g$  for 5 min at room temperature, following by washing twice with PBS. After centrifugation as above, cells were suspended in 200  $\mu$ l of methanol in 1.5 ml microtubes, and were incubated for 10 min at room temperature. One drop of cell suspension was dripped onto a glass slide and completely air-dried. Dried cells were incubated with 500 ng/ml of DAPI for 50 s and were then immediately washed twice with PBS. Stained cells were mounted in Vectashield (Vector Laboratories Inc.), and visualized using a fluorescence microscope (BX50; Olympus Corp.). In another experiment, *Tokyovirus*-infected amoeba cells were also stained with DAPI as described above at 12, 18, and 24 h p.i. Amoeba cells containing virion factories were manually counted up to 300 or 400 cells. The ratio of amoeba cells containing each type of virion factory (Large VF, 2 or more VFs, 1 VF, and no VF) were tested at 0, 2, 4, 6, 8, 10, 12, 18, and 24 h p.i. Experiments at 2 h to 10 h p.i. and those at 12 h to 24 h p.i. were performed separately. Inset fluorescent images show typical amoeba cells possessing virion factories of different types.

Fig. S4. Genome comparison between different subclade members of *Marseilleviridae* using dot plot analysis. (A) Dot plot analysis between *Melbournevirus* (subclade A) and *Brazilian marseillevirus* (subclade D). (B) Dot plot analysis between *Tunisvirus* (subclade C) and *Brazilian marseillevirus* (subclade D). (C) Dot plot analysis between *Tunisvirus* (subclade C) and *Lausannevirus* (subclade B).

Fig. S5. Genome comparison between the same subclade members of *Marseilleviridae* using dot plot analysis. (A) Dot plot analysis between *Marseillevirus* and *Melbournevirus* (both subclade A). (B) Dot plot analysis between *Marseillevirus* and *Cannes 8 virus* (both subclade A). (C) Dot plot analysis between *Melbournevirus* and *Cannes 8 virus* (both subclade A). (D) Dot plot analysis between *Lausannevirus* and *Port-miou virus* (both subclade B). (E) Dot plot analysis between *Tunisvirus* and *Insectomime virus* (both subclade C).

Fig. S6. Unrooted maximum-likelihood phylogenetic tree of 30 DNA polymerase sequences constructed using MEGA6 software (26). The tree was reconstructed based on an alignment (634 sites) derived from the full-length alignment, in which any

column containing a gap had been discarded. Numbers at the branch points denote percent bootstrap values. Accession numbers of respective sequences are listed in Table S1. Alphabets A, B, and C indicate subclades of *Marseilleviridae*, respectively.

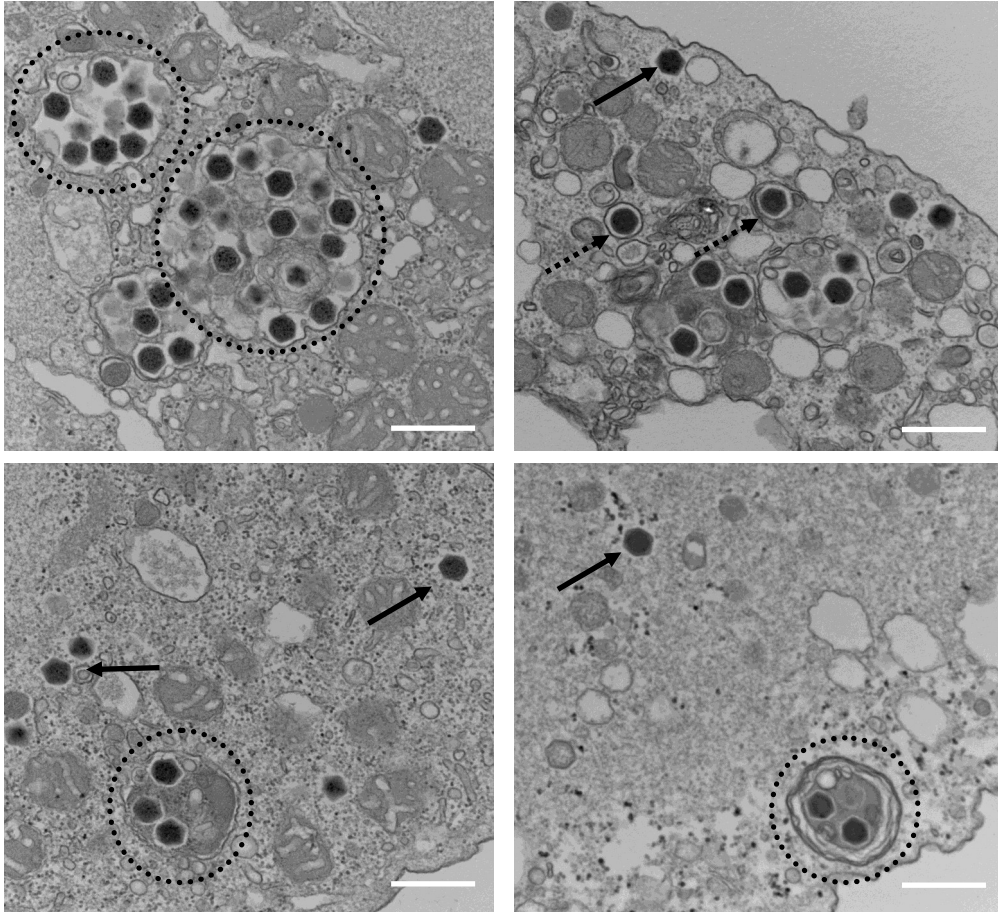

**Fig. S1**  
**Masaharu Takemura**



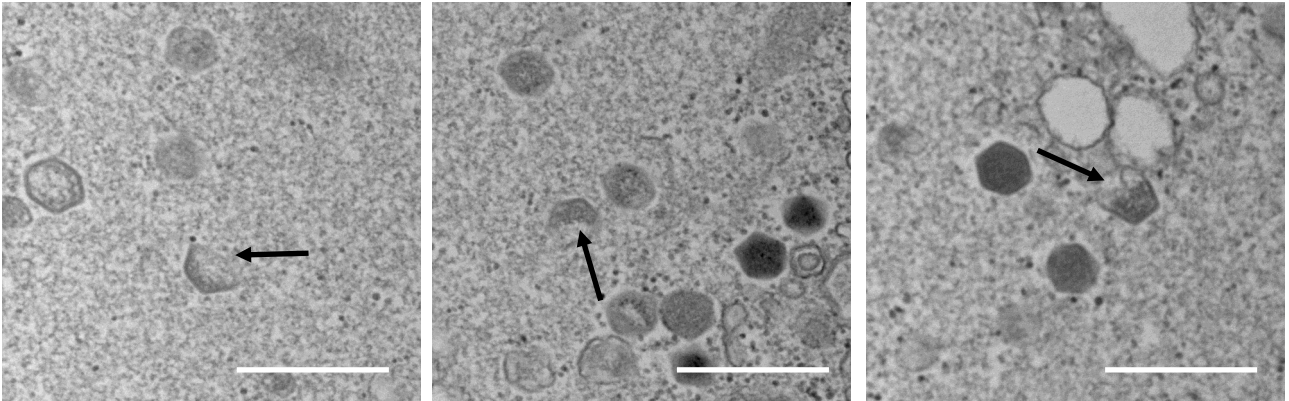

**Fig. S2**  
**Masaharu Takemura**

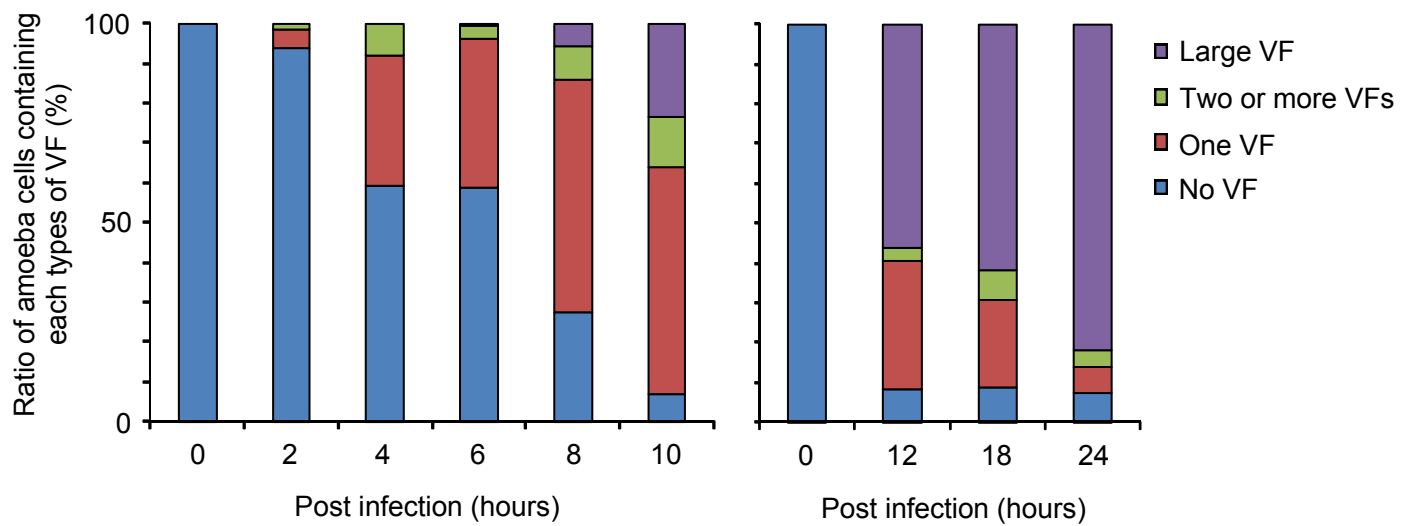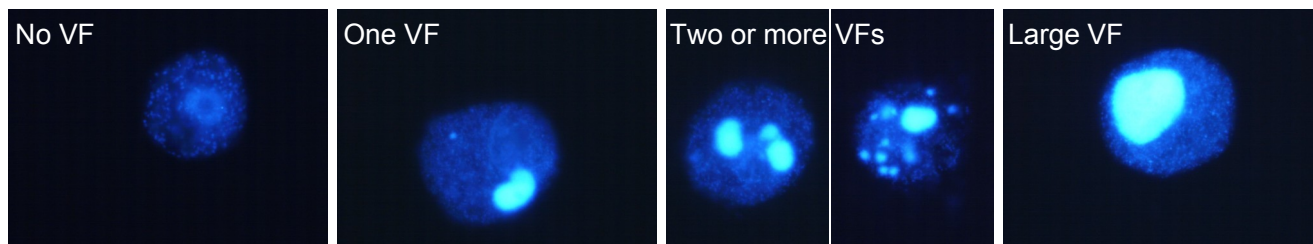

**Fig. S3**  
Masaharu Takemura

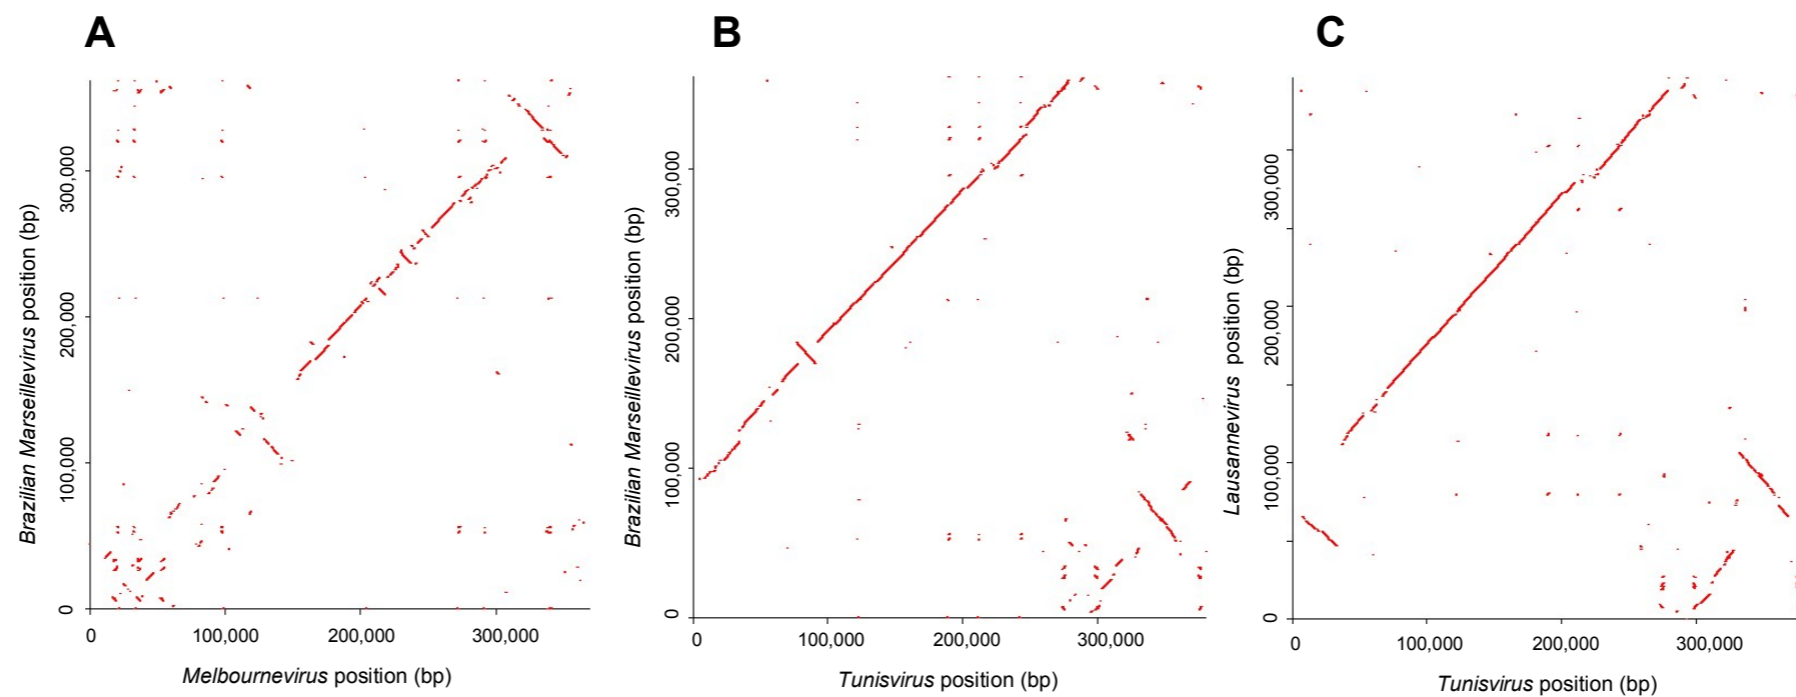

**Fig. S4**

**Masaharu Takemura**

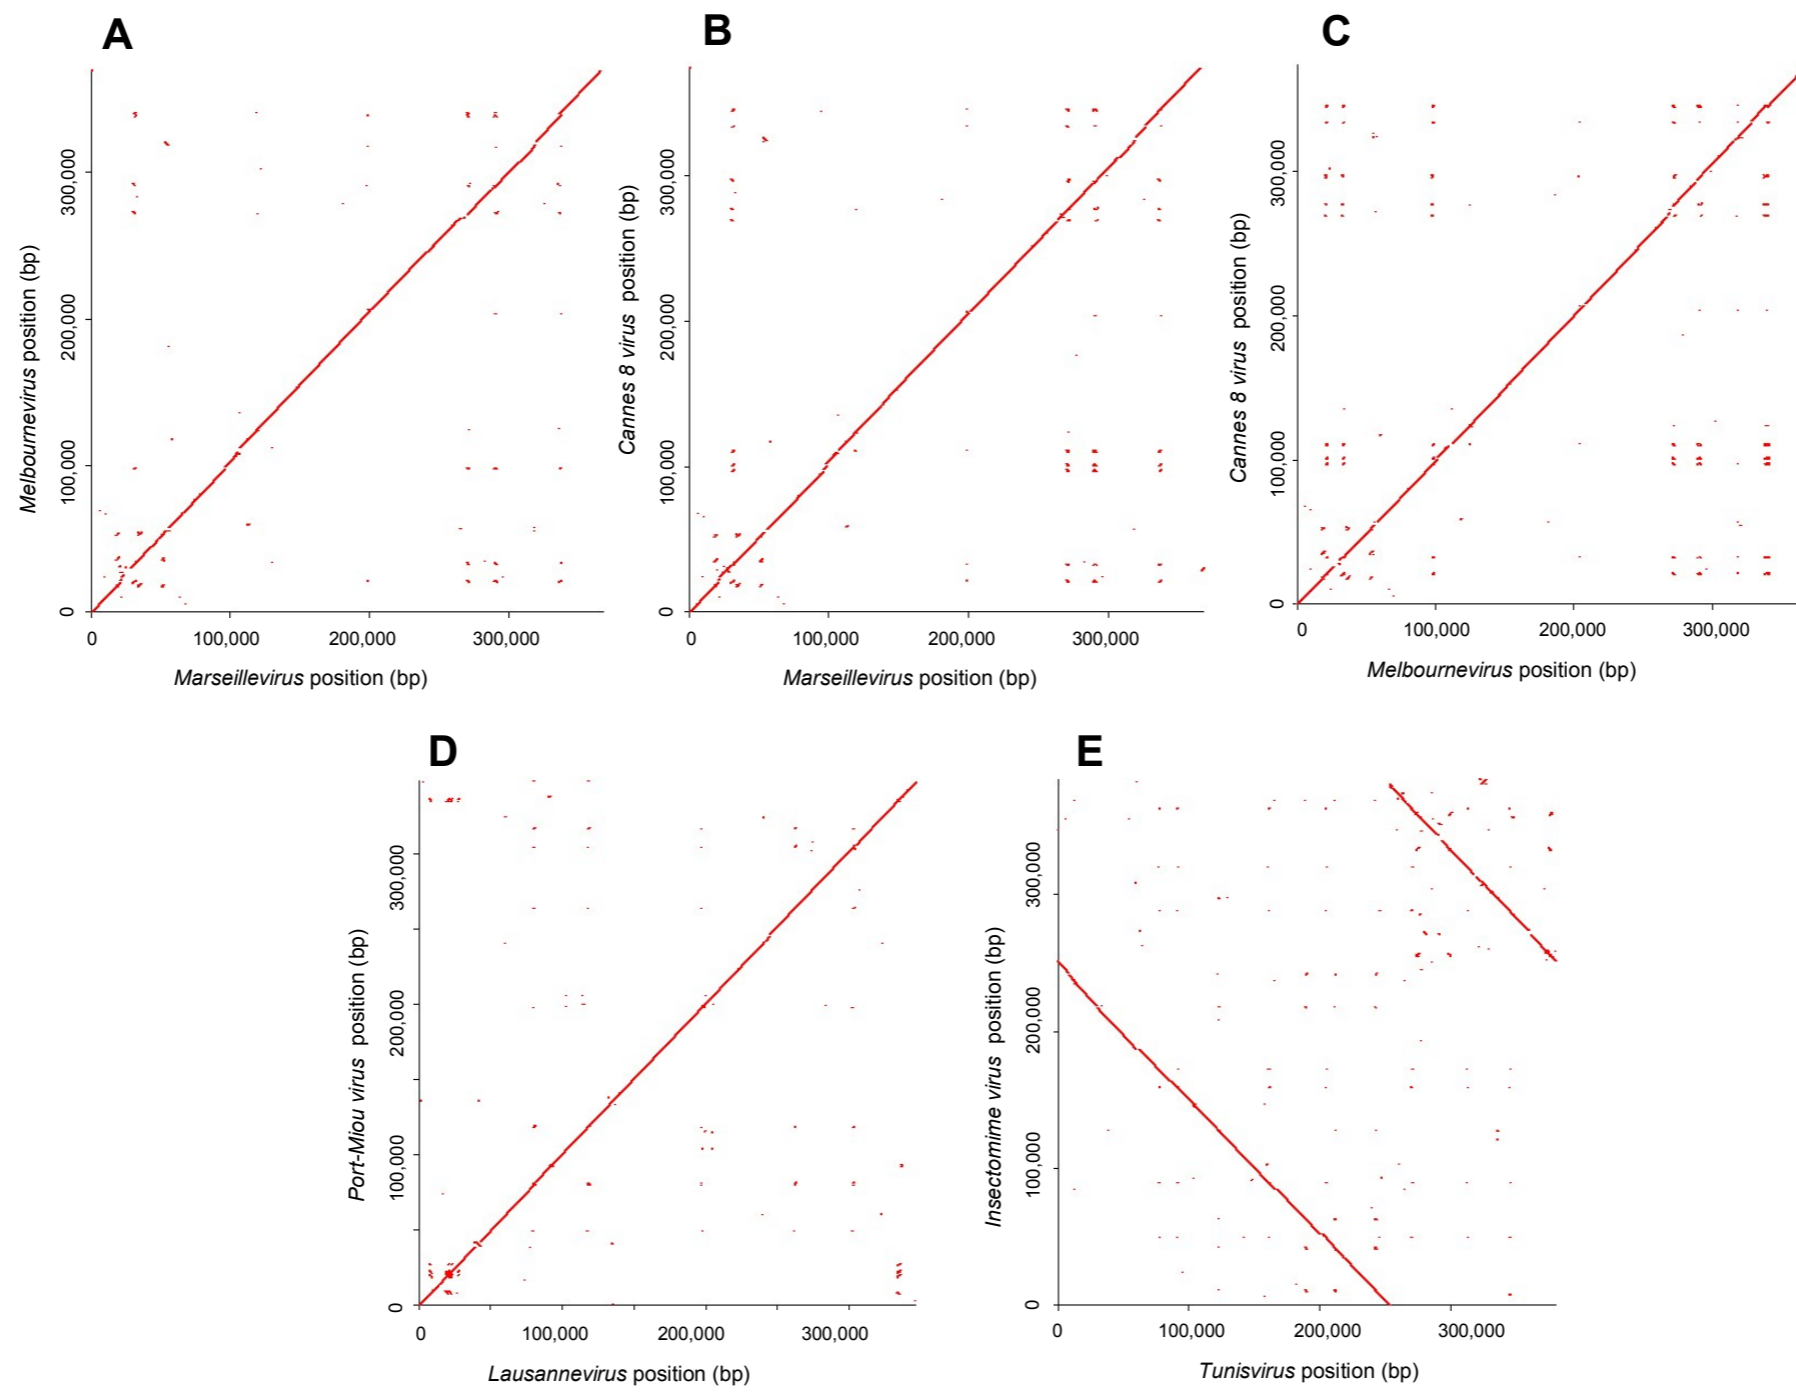

**Fig. S5**

Masaharu Takemura

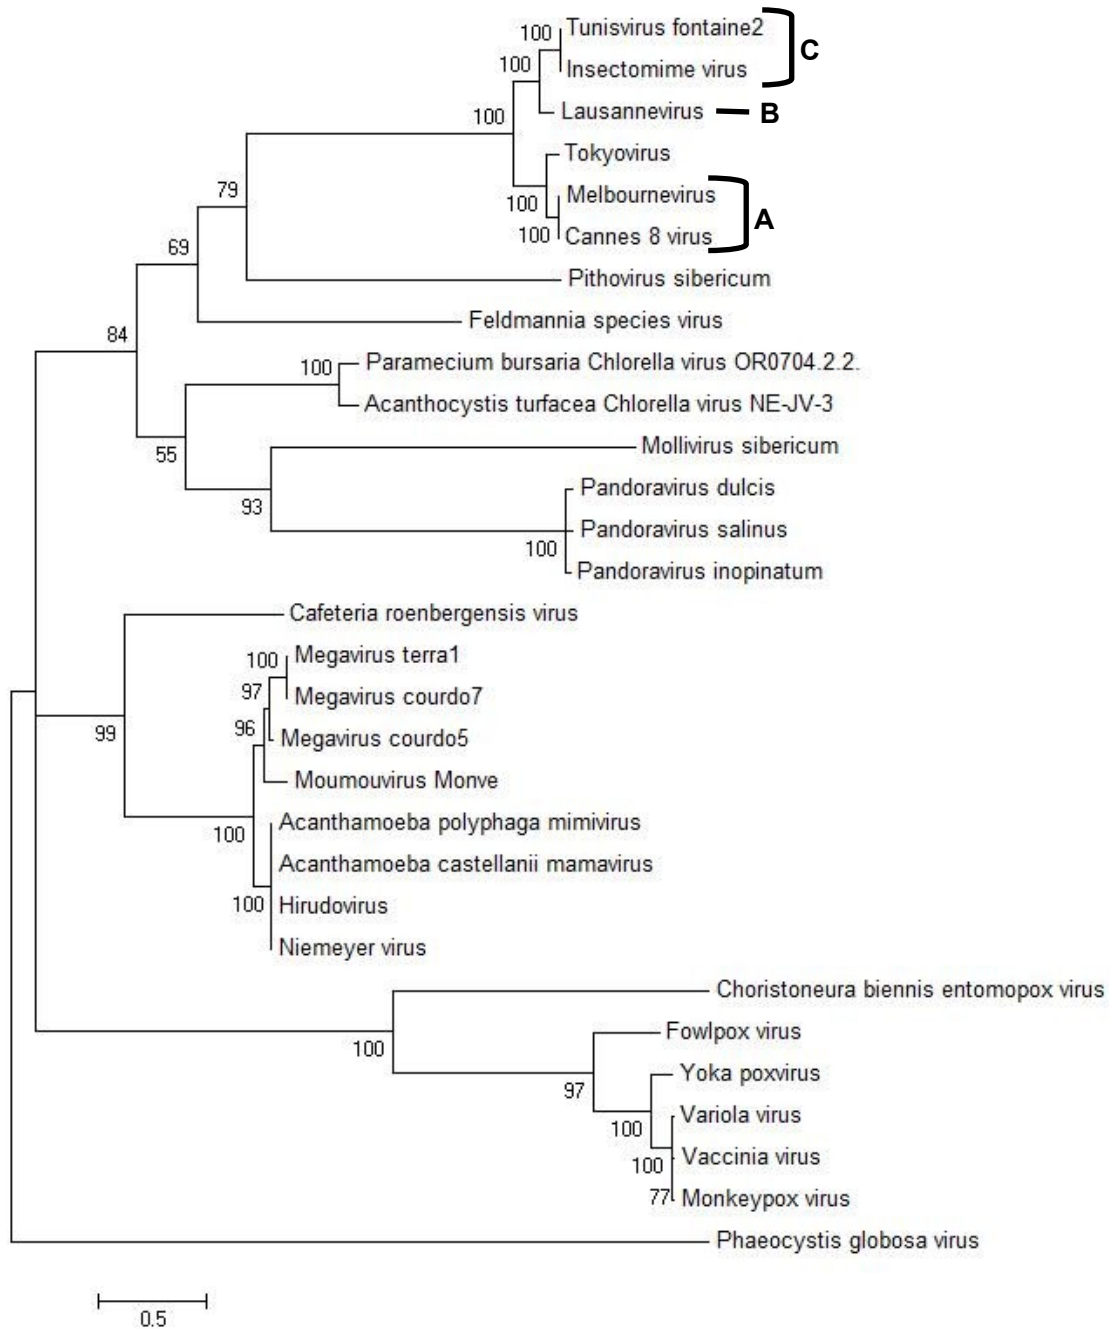

**Fig. S6**  
**Masaharu Takemura**
